1 **Adverse Outcomes in Pulmonary Tuberculosis patients on Retreatment Regimen: Evaluation**  
2 **of Pharmacokinetic Estimates as Risk Indicators**

3

4 Anant Mohan<sup>1</sup>, Anuj Bhatnagar<sup>2</sup>, Tarang Gupta<sup>1</sup>, Sunita Kanswal<sup>1</sup>, Ujjalkumar Das<sup>1</sup>,  
5 Thirumurthy Velpandian<sup>1</sup>, Randeep Guleria<sup>1</sup> and Urvashi B. Singh<sup>1\*</sup>

6

7

8 <sup>1</sup> All India Institute of Medical Sciences, New Delhi, India

9 <sup>2</sup> Rajan Babu Institute of Pulmonary Medicine and Tuberculosis and Hospital, New Delhi, India

10

11 **\*Correspondence to:**

12 **drurvashi@gmail.com**

13

14

15 **Key words :** TDM, ATT, Retreatment regimen, Pharmacokinetics

16

17

18

19

20

21

22

23 **Abstract**

24 Patients with pulmonary tuberculosis (PTB) who fail therapy or develop a relapse are initiated  
25 on re-treatment regimen. These patients are known to have adverse outcomes. This study  
26 aimed to determine the role of plasma levels of Anti-tubercular drugs in treatment outcome.  
27 Plasma levels of retreatment regimen drugs [Isoniazid(INH), Rifampicin(RIF), Pyrazinamide(PZA),  
28 Ethambutol(EMB), and Streptomycin(STM)] were compared between treatment  
29 responsive/cured and treatment failure/not-cured patients. Plasma drug levels were analysed  
30 by LC-MS/MS at different time points in 134 PTB patients on retreatment regimen. Of the 134  
31 subjects, 108 were cured, 17 patients developed multi-drug resistant TB (MDR-TB), and 9  
32 patients remained smear positive at treatment completion (8 months). The two-hour plasma  
33 levels ( $C_{2hr}$ ) (geometric mean) were lower in 'Not Cured' subjects compared to 'Cured' subjects  
34 Notably, in the 26 'Not Cured' subjects,  $C_{2hr}$  plasma levels after first dose at Day0 were  
35 significantly low (INH: 0.86 vs 2.94  $\mu\text{g/ml}$   $p \leq 0.002$ , RIF: 0.56 vs 2.55  $\mu\text{g/ml}$   $p \leq 0.003$ , PZA: 1.85 vs  
36 26.58  $\mu\text{g/ml}$   $p \leq 0.000$  and EMB: 0.72 vs 1.53  $\mu\text{g/ml}$   $p \leq 0.010$ ). In contrast, STM levels were higher  
37 (31.84 vs 18.08  $\mu\text{g/ml}$   $p \leq 0.007$ ). Based on ROC analysis of the data, therapeutic indicator  
38 values for successful treatment outcome were  $C_{2hr}$  plasma levels of 10.6  $\mu\text{g/ml}$  for PZA, 1.14  
39  $\mu\text{g/ml}$  for RIF, 1.86  $\mu\text{g/ml}$  for INH and 1.24  $\mu\text{g/ml}$  for EMB. Therapeutic failure in PTB patients  
40 on retreatment regimen is associated with lower plasma drug levels. Therapeutic drug  
41 monitoring would prove useful to maintain drug levels above the minimum cut-off levels for  
42 obtaining favourable clinical outcome.

43

44 **Introduction**

45 In cases of relapse after a successful anti-tubercular therapy (ATT), loss to follow-up or  
46 treatment failure, and in others who have undergone previous treatment to TB (1), the  
47 standardised retreatment regimen consisting of Isoniazid(INH/H), Rifampicin(RIF/R),  
48 Pyrazinamide (PZA/Z), Ethambutol(EMB/E) and Streptomycin(STM/S) for 2 months, followed by  
49 HRZE for 1 month and HRE for 5 months (2)is shown to render poor outcomes(3-5) and one of  
50 the reasons postulated for this retreatment failure in patients with TB is the sub-therapeutic  
51 ATT drug levels or their low bioavailability (6-10) that can lead to slower treatment response,  
52 acquired drug resistance, and relapse (11, 12) .

53 Monitoring of plasma levels of drugs to tailor patient's regimen, in a strategy called as  
54 'Therapeutic Drug Monitoring' (TDM) has shown promising results in reaching requisite  
55 treatment goals in PTB patients (13, 14) . Although TDM has been shown to predict clinical  
56 outcomes in treatment-naive PTB (12), no study has exclusively monitored drug levels in PTB on  
57 a retreatment regimen. TDM may have important implications for improving outcomes in this  
58 group of patients. To address this, we evaluated plasma levels of 5 ATT drugs on Day0 ( 0 and  
59 2hrs after first dose) and after 2, 3, 5 & 8 months of initiation of treatment in subjects who  
60 were prescribed PTB retreatment regimen.

61

62

63

## 64 **Results**

65 **Patients, Treatment Regimens and Outcomes:** A total of 134 pulmonary TB patients with past  
66 history of TB and ATT medication were enrolled in the study. One hundred twenty one (90.3%)  
67 patients agreed to the intermittent ATT schedule. (DOTS as per RNTCP guidelines), while 13  
68 (9.7%) preferred the daily regimen. The demographic details and clinical history of the patients  
69 is shown in Table 1 and microbiological testing data is shown in Table 2.

70 All 134 patients had a confirmed drug-susceptible PTB at the start of treatment. Of these, 108  
71 (80.5%) patients were declared cured of TB and classified as 'Cured'. Nine patients (6.72%) were  
72 not TB-free as per microbiological testing or physical examination. Seventeen patients (12.7 %)  
73 developed Rif resistance (RR) MDR (Multi-drug-resistant TB) by the end of third month of  
74 therapy and were referred for MDR regimen. Taken together, these 26 patients were  
75 categorized as 'Not Cured'.

76 **Plasma Drug Levels:** Plasma levels for H, R, Z, E and S were estimated in all patients for time  
77 points day0, followed by month 2, 3, 5 and 8 for H, R, E and day0, 2<sup>nd</sup> month for Z and on day0  
78 for S.

79 In the 17 patients who developed RR, plasma levels for H, R, Z, E and S were estimated until 2<sup>nd</sup>  
80 and 3<sup>rd</sup> month depending on time of MDR diagnosis.

81 A comparison of drug levels between 'cured' and 'not cured' patient groups according to  
82 timelines during the treatment is shown in table 3 and figure 1a. Statistically, plasma levels of  
83 isoniazid were significantly higher at 0, 2<sup>nd</sup>, and 5<sup>th</sup> month time points, rifampicin levels were  
84 significantly higher at day0, comparable at month 2<sup>nd</sup> and higher at 3<sup>rd</sup>, 5<sup>th</sup> and 8<sup>th</sup> months.

85 Pyrazinamide and ethambutol levels were significantly higher at both Day0 and 2<sup>nd</sup> months. In  
86 contrast to the above four drugs, streptomycin levels were found to be significantly higher on  
87 day0 in the 'Not Cured' category of patients. Of note, all thirteen patients in the study who had  
88 been on daily dosing regimen, were cured after the therapy, while all patients who acquired  
89 drug resistance or failed treatment had been on intermittent therapy.

90 **Pharmokinetic variability in patient population:** Plasma concentrations were found to be  
91 widely distributed in the patients. Overall, the highest drug concentrations were attained on  
92 day0-C<sub>2hr</sub> time-point after which most peaks declined with time. Compared to the reference  
93 values for adults (15) (16), lower average (GM) drug plasma levels were prevalent at all time  
94 points in our study population (Table 3 ,figure 2). 22.3 % (27/121) of patients had plasma  
95 concentrations within the reference target range. Only 4/26 'not cured' patients had drug levels  
96 within these target ranges and each of these patients achieved 'within range' plasma level for a  
97 single drug only.

#### 98 **Area under the ROC curve and predictor values for C<sub>2hr</sub>plasma ATT levels**

99 Plasma drug levels were significantly lower in 'Not Cured' group when compared to the 'Cured  
100 Group' for all ATT drugs at C<sub>2hr</sub> on day0. Hence we analysed the ROC curves for this time point  
101 (Table4, Figure3). The area under the ROC curve were the highest for PZA (0.924) followed by  
102 INH (0.788) and RIF (0.77). Optimal cut-off values that predict therapeutic indicator drug levels  
103 (minimum levels of drugs that when achieved in patient blood would likely predict a positive  
104 treatment outcome) are shown in Table 4. PZA (10.6 µg/ml, 86% sensitivity, 87% specificity)  
105 emerged as the best discriminating therapeutic indicator for treatment success in this group of  
106 patients (Figure 4).

## 107 **Discussion**

108 There is a paucity of studies discussing adverse outcomes in PTB re-treatment subjects. Here,  
109 we report a serial estimation of levels of first-line ATT drugs measured at five time-points  
110 during therapy and correlated to disease outcome exclusively in 134 PTB re-treatment patients.

111 We found a subject-wise variability in plasma concentrations of all four TB drugs which is in  
112 concordance with many other studies.(9, 15). Majority (68.5%) patients had lower drug  
113 concentrations than the reference values(15, 16) . In the 'Not Cured' category,  $C_{2hr}$  levels of four  
114 ATT drugs remained much below reference target ranges for adults almost at all time points  
115 during the therapy, and were significantly lower than levels in 'Cured' patients. Patients with  
116 extremely low  $C_{2hr}$  ATT levels in plasma on day0 had outcomes such as acquired MDR-TB and  
117 treatment failure. Post-hoc analysis showed that patients with statistically significant low drug  
118 levels (65%) got acquired drug resistance within three months of enrolment in the study. All of  
119 these patients had lower levels in comparison to both cured and not cured patients (Figure 1b).

120 No statistically significant difference in the drug plasma levels of patients on daily dose as  
121 compared to those on intermittent dosing was evident; however, the plasma levels were higher  
122 in daily dose patients (Figure4). A significant increase in microbiologically defined adverse  
123 outcomes in patients on intermittent therapy has been previously reported by Johnston et al.  
124 where pooled analysis and meta regression showed that intermittent regimen in ATT was  
125 inferior in all 3 outcomes viz. failure, relapse and acquired drug resistance (17). WHO has since  
126 2008 recommended daily dosing (2) and country programs too has now implemented daily  
127 DOTS therapy (18)

128 Efficacy of first-line ATT has been shown to strongly associate with area under the curve (AUC).  
129 AUC derived from 9-time points sampling during the first 24 hrs post-drug administration were  
130 predictive of long-term clinical outcomes in PTB patients (12). Microbicidal effects of ATT are  
131 best described by AUC:MIC and C<sub>max</sub>:MIC ratios (19). Such studies require multiple sampling,  
132 are stressful to TB patients and not practical in resource-limited settings. We collected samples  
133 at trough concentrations (C<sub>0</sub>) and 2 hour concentrations (C<sub>2hr</sub>) post drug on day 0, months 2, 3, 5  
134 and 8 in order to identify the best indicator time point for single sampling as drug levels at C<sub>2hr</sub>  
135 correlate well with C<sub>max</sub> and/or AUC (15, 16, 20, 21) . However, the possibility that low C<sub>2hr</sub>  
136 plasma concentrations could be a result of delayed absorption rather than a low peak  
137 concentration and could miss the actual peak concentration C<sub>max</sub> (21) cannot be ruled out.

138 Instead of using predetermined C<sub>max</sub> concentrations, we first enrolled patients randomly and  
139 dichotomized them based on treatment outcomes (clinical with microbiological findings) at the  
140 end of the study. Loss to follow-up in a few patients, inability to provide sputum specimens,  
141 undetectable plasma drug levels etc. have caused a few gaps in our data. Patients were  
142 encouraged to comply and we sought to include all available data for analysis.

143 Peak drugs levels attained for INH, RIF and PZA reduced with time in our patients in both  
144 'cured' and 'not cured' groups, possibly due to individual pharmacokinetic variations, poor  
145 drug absorption, pre-hepatic metabolism and hepatic enzymes induction, drug binding to  
146 plasma protein, or drug-drug interactions (22, 23). Rifampicin is reported to be highly bound to  
147 plasma proteins in TB patients as well as healthy subjects, leading to a loss in circulating levels,  
148 explaining decrease in bioavailability of Rifampicin from 93% to 68% after three weeks of  
149 treatment (24-26) . It is tempting to hypothesize that drug-drug interaction is at its minimal on

150 Day0, but may have stronger and complex interactions to compromise drug bioavailability  
151 resulting in lower  $C_{2hr}$  concentrations subsequently during therapy possibly due to induction of  
152 drug metabolism or transporter protein synthesis. Day0- $C_{2hr}$  drug levels for cured patients were  
153 higher than subsequent time points except for EMB for which the levels were relatively  
154 constant.

155 We also report *therapeutic indicator levels*, the minimal drug plasma level values predicting a  
156 positive treatment outcome (Table 4) for all the four ATT drugs. We believe that the day0- $C_{2hr}$   
157 levels especially that of PZA might be useful as a cut-off reference for dosage adjustments for  
158 clinicians during therapy and help mitigate adverse events or treatment failure in DOTS  
159 Category II patients early on. Similar to our findings, a recent study where drug exposure and  
160 MIC were evaluated in PTB patients, PZA levels were shown to be important in predicting poor  
161 clinical response suggesting the use of PZA and RIF at levels above a threshold value to improve  
162 treatment outcomes. However, the inter-play between PZA and RIF may affect the final levels  
163 detected.(27)

164 Evaluation of certain other factors which may contribute to patient outcome was beyond the  
165 scope of the present study. Improvement in nutritional status and immune response may  
166 complement the pharmacotherapy. Low INH concentrations observed in the patients could also  
167 be due to the well recognised pharmacogenetic variants with acetylator status (28-30).  
168 Another limitation was that we could not delineate the cumulative effects of the drugs or drug-  
169 drug interference in the regimen. Our study had some missing data due to missing patient visits  
170 (follow-up) and few undetectable drug levels in some patients. These, however, will unlikely  
171 impact the overall results obtained.



172 Overall, we conclude that treatment outcomes in pulmonary tuberculosis patients on  
173 retreatment regimen are strongly linked to plasma levels of drugs, with low concentrations  
174 leading to poor treatment outcomes. Our findings emphasize the importance of therapeutic  
175 drug monitoring and dose adjustment to maintain plasma levels above a critical threshold.

176

## 177 **Methods and Materials**

178 **Ethics:** This study was done at the All India Institute of Medical Sciences (AIIMS), New Delhi,  
179 India from 2012-2014 and approved by the Institutional Ethics Committee, AIIMS (IEC/NP-  
180 251/2012&RP-22/2012)

181 **Patients :** Patients diagnosed with drug susceptible PTB (and no other co-morbidities), aged  
182 between 15 to 65 yrs and advised the retreatment regimen under National TB Elimination  
183 Program (NTEP) (erstwhile Revised National TB Control Program (RNTCP) were included in this  
184 study (31) . Informed written consent was obtained from each patient.

185 A detailed demographic data and clinical history was obtained (Table 1), and results of sputum  
186 acid-fast stains, cultures and all laboratory data were recorded (Table 2). A brief diagram of the  
187 study approach is shown in supplementary figure S1.

188 **Treatment Regimen:** ATT was given as per the prevailing guidelines of the RNTCP at the time of  
189 the study (2012-2014) for previously treated TB cases (erstwhile Category II ) i.e., INH + RIF+  
190 EMB + PZA + injectable STM for 2 months, followed by INH + RIF+ EMB + PZA for 1 month , and  
191 INH + RIF+ EMB for 5 months as per the weight bands.(H,5mg/Kg , R,10 mg/Kg , Z,30 mg/Kg ,  
192 E,15 mg/Kg, S,15 mg/Kg( in daily regimen) and H,10 mg/Kg , R,10 mg/Kg , Z,30 mg/Kg , E,15

193 mg/Kg, S,15 mg/Kg ( intermittent regimen). RNTCP followed intermittent regimen  
194 recommended by WHO (2),Clinical follow-up of patients was done at 0 day, weeks 2, 4, 8, 12,  
195 20, and 32 (at completion of 8 months). Therapy was not modified during the study.

## 196 **Sample collection**

197 **Sputum samples:** For AFB smear, MGIT culture and Xpert MTB/RIF assays, 10 ml sputum sample  
198 was collected from study subjects at the time of recruitment (Day0) and at the end of 2, 3, 5 and  
199 8 months.

200 **Blood samples:** Half ml blood sample was collected for the measurement of baseline drug  
201 concentration just before intake of daily dose of ATT and define the trough of drug level, on all  
202 days of sample collection. ATT medicines were given under observation of the field worker  
203 before breakfast as prescribed, following which the second blood sample (0.5 ml) was collected  
204 at 2 hours from the time of drug intake. Blood samples were collected in polypropylene BD  
205 vacuutainers containing EDTA and sodium ascorbate. Separated plasma was stored in plain  
206 endotoxin free vials at -80<sup>0</sup>C for further use.

207 **Samples processing and AFB-staining:** Samples were processed for decontamination by  
208 Modified Petroff's method and stained for acid fast bacilli by Ziehl-Neelson's staining as per  
209 standard protocol (32)

210 **Culture for *Mycobacterium tuberculosis*:** Concentrated sediment from decontaminated sample  
211 was inoculated in MGIT 960 medium (BD Biosciences) and cultured for *Mycobacterium*  
212 *tuberculosis* (MTB) using standard MGIT<sup>TM</sup> method as per manufacturer's instructions (Beckton  
213 Dickinson, MD, USA)

214 **Xpert MTB/RIF Assay**

215 Xpert MTB/RIF assay (Cepheid, Sunnyvale, CA, USA) was used for detection of MTB and  
216 resistance to Rifampicin, as per manufacturer's instructions.

217 **LC-MS/MS and  $C_{max}$  determination**

218 Level of drugs in plasma samples were analysed by Liquid chromatography-tandem mass  
219 spectrometry (LC-MS/MS) as described previously (33). An Ultra High Performance Liquid  
220 Chromatographic system (UHPLC, Thermo Surveyor system, CITY, USA) coupled with a triple  
221 quadrupole mass spectrometer API-4000 QTrap fitted with Turbo Ion Spray Ionization (ESI)  
222 source (MDS SCIEX, Applied Biosystems, USA) was operated in positive ion mode for separation  
223 and detection of drug concentrations of the anti-tuberculosis drugs (H, R, E ,Z and S). Standards  
224 were procured from Sigma-Aldrich Ltd, India and the validation of the analytical method was  
225 done as per United States Food and Drug Administration (US-FDA) guidelines for bioanalytical  
226 method validation (U.S. Food & Drug Administration, 2013).

227 Pharmacokinetic parameters of  $C_{0hr}$  were measured for baseline plasma drug concentration and  
228  $C_{2hrs}$  for steady state  $C_{max}$  plasma concentration. The 2-hour plasma concentrations were  
229 compared with the reference  $C_{2hr}$  concentrations as described previously (15, 16)

230 **Evaluation of Treatment Response:** Patients were defined as 'cured' if their sputum were AFB-  
231 negative within 5 months of treatment and continued to be negative until the end of treatment  
232 along with the physician's clinical assessment of TB free status. 'Not Cured' status was defined  
233 as presence of a positive AFB smear beyond 5 months of a compliant tuberculosis treatment,  
234 presence of a drug-resistant strain during any point of treatment, or a physician's evaluation of

235 symptoms and clinical status after 5 months of treatment compared with the status at  
236 diagnosis. (31)

237 **Statistical Analysis:** Data were recorded and analysed using MS-Excel-2007 and SPSS 22.0 for  
238 Windows® (SPSS Inc., Chicago, IL, USA). Chi-square tests were used to investigate any  
239 association of patient demography with clinical outcomes. Geometric mean (GM) plasma  
240 concentrations between the patients groups were compared using one way ANOVA and Mann  
241 Whitney U tests. Receiver operator characteristics (ROC) curves were used to study the  
242 discriminatory abilities of ATT plasma levels between the two categories and optimal cut off for  
243 therapeutic indicator levels (TIL). All tests were two sided, with  $P \leq 0.05$  indicating a statistically  
244 significant difference.

245

#### 246 **Acknowledgement**

247 We are thankful to our patients for the success of this study. We also thank Mr. Ashish Datt  
248 Upadhayay, Statistical Assistant, Department of Biostatistics, AIIMS, New Delhi for the ROC  
249 curve analysis.

250 We thank DST-FIST for providing liquid chromatography coupled tandem mass spectroscopy  
251 facility for the analysis.

252

#### 253 **References**

254 1. WHO. 2013; updated Dec 2014 and Jan 2020. Definitions and reporting framework for  
255 tuberculosis—2013 revision. World Health Organisation Switzerland, Geneva.

- 256 2. WHO. 2010 (updated 2017). Treatment of Tuberculosis Guidelines,4th edition  
257 Organisation WH, Geneva, Switzerland.
- 258 3. Jones-López EC, Ayakaka I, Levin J, Reilly N, Mumbowa F, Dryden-Peterson S, Nyakoojo  
259 G, Fennelly K, Temple B, Nakubulwa S, Joloba ML, Okwera A, Eisenach KD, McNerney R,  
260 Elliott AM, Ellner JJ, Smith PG, Mugerwa RD. 2011. Effectiveness of the standard WHO  
261 recommended retreatment regimen (category II) for tuberculosis in Kampala, Uganda: a  
262 prospective cohort study. PLoS Med 8:15.
- 263 4. Cohen DB, Davies G, Malwafu W, Mangochi H, Joeke E, Greenwood S, Corbett L, Squire  
264 SB. 2019. Poor outcomes in recurrent tuberculosis: More than just drug resistance? PLoS  
265 One 14.
- 266 5. Sisodia RS, Wares DF, Sahu S, Chauhan LS, Zignol M. 2006. Source of retreatment cases  
267 under the revised national TB control programme in Rajasthan, India, 2003. Int J Tuberc  
268 Lung Dis 10:1373-9.
- 269 6. Kimerling ME, Phillips P, Patterson P, Hall M, Robinson CA, Dunlap NE. 1998. Low serum  
270 antimycobacterial drug levels in non-HIV-infected tuberculosis patients. Chest 113:1178-  
271 83.
- 272 7. Barakat MT, Scott J, Hughes JM, Walport M, Calam J, Friedland JS, Ind PW, McKenna C.  
273 1996. Grand rounds--Hammersmith Hospital. Persistent fever in pulmonary  
274 tuberculosis. Bmj 313:1543-5.
- 275 8. Heysell SK, Moore JL, Keller SJ, Houpt ER. 2010. Therapeutic drug monitoring for slow  
276 response to tuberculosis treatment in a state control program, Virginia, USA. Emerg  
277 Infect Dis 16:1546-53.

- 278 9. Chideya S, Winston CA, Peloquin CA, Bradford WZ, Hopewell PC, Wells CD, Reingold AL,  
279 Kenyon TA, Moeti TL, Tappero JW. 2009. Isoniazid, rifampin, ethambutol, and  
280 pyrazinamide pharmacokinetics and treatment outcomes among a predominantly HIV-  
281 infected cohort of adults with tuberculosis from Botswana. *Clin Infect Dis* 48:1685-94.
- 282 10. Park JS, Lee JY, Lee YJ, Kim SJ, Cho YJ, Yoon HI, Lee CT, Song J, Lee JH. 2015. Serum Levels  
283 of Antituberculosis Drugs and Their Effect on Tuberculosis Treatment Outcome.  
284 *Antimicrob Agents Chemother* 60:92-8.
- 285 11. Srivastava S, Pasipanodya JG, Meek C, Leff R, Gumbo T. 2011. Multidrug-resistant  
286 tuberculosis not due to noncompliance but to between-patient pharmacokinetic  
287 variability. *J Infect Dis* 204:1951-9.
- 288 12. Pasipanodya JG, McIlleron H, Burger A, Wash PA, Smith P, Gumbo T. 2013. Serum drug  
289 concentrations predictive of pulmonary tuberculosis outcomes. *J Infect Dis* 208:1464-73.
- 290 13. Zuur MA, Bolhuis MS, Anthony R, den Hertog A, van der Laan T, Wilffert B, de Lange W,  
291 van Soolingen D, Alffenaar JW. 2016. Current status and opportunities for therapeutic  
292 drug monitoring in the treatment of tuberculosis. *Expert Opin Drug Metab Toxicol*  
293 12:509-21.
- 294 14. Motta I, Calcagno A, Baietto L, Bigliano P, Costa C, Baruffi K, Fatiguso G, D'Avolio A, Di  
295 Perri G, Bonora S. Pharmacokinetics of first-line antitubercular drugs in plasma and  
296 PBMCs. *Br J Clin Pharmacol*. 2017 May;83(5):1146-1148. doi: 10.1111/bcp.13196. Epub  
297 2017 Jan 18.
- 298 15. Peloquin CA. 2002. Therapeutic drug monitoring in the treatment of tuberculosis. *Drugs*  
299 62:2169-83.

- 300 16. Burhan E, Ruesen C, Ruslami R, Ginanjar A, Mangunegoro H, Ascobat P, Donders R, van  
301 Crevel R, Aarnoutse R. 2013. Isoniazid, rifampin, and pyrazinamide plasma  
302 concentrations in relation to treatment response in Indonesian pulmonary tuberculosis  
303 patients. *Antimicrob Agents Chemother* 57:3614-9.
- 304 17. Johnston JC, Campbell JR, Menzies D. 2017. Effect of Intermittency on Treatment  
305 Outcomes in Pulmonary Tuberculosis: An Updated Systematic Review and Metaanalysis.  
306 *Clin Infect Dis* 64:1211-1220.
- 307 18. NTEP (National Tuberculosis Elimination Programme fRNTCP, RNTCP). 2017 March.  
308 National Strategic Plan for Tuberculosis: 2017-25 Elimination by 2025. Welfare MoHwF,  
309 Ministry of Health with Family Welfare, Nirman Bhawan, New Delhi.  
310 <https://tbcindia.gov.in/WriteReadData/National%20Strategic%20Plan%202017-25.pdf>.
- 311 19. Hall RG, Leff RD, Gumbo T. 2009. Treatment of active pulmonary tuberculosis in adults:  
312 current standards and recent advances. *Insights from the Society of Infectious Diseases*  
313 *Pharmacists. Pharmacotherapy* 29:1468-81.
- 314 20. Saktiawati AMI, Harkema M, Setyawan A, Subronto YW, Sumardi, Stienstra Y, Aarnoutse  
315 RE, Magis-Escurra C, Kosterink JGW, van der Werf TS, Alffenaar JC, Sturkenboom MGG.  
316 2019. Optimal Sampling Strategies for Therapeutic Drug Monitoring of First-Line  
317 Tuberculosis Drugs in Patients with Tuberculosis. *Clin Pharmacokinet* 58:1445-1454.
- 318 21. Peloquin CA. 1997. Using therapeutic drug monitoring to dose the antimycobacterial  
319 drugs. *Clin Chest Med* 18:79-87.
- 320 22. Loos U, Musch E, Jensen JC, Schwabe HK, Eichelbaum M. 1987. Influence of the enzyme  
321 induction by rifampicin on its presystemic metabolism. *Pharmacol Ther* 33:201-4.

- 322 23. Loos U, Musch E, Jensen JC, Mikus G, Schwabe HK, Eichelbaum M. 1985.  
323 Pharmacokinetics of oral and intravenous rifampicin during chronic administration. *Klin*  
324 *Wochenschr* 63:1205-11.
- 325 24. Peloquin CA. 2001. Pharmacological issues in the treatment of tuberculosis. *Ann N Y*  
326 *Acad Sci* 953:157-64.
- 327 25. Nahid P, Dorman SE, Alipanah N, Barry PM, Brozek JL, Cattamanchi A, Chaisson LH,  
328 Chaisson RE, Daley CL, Grzemska M, Higashi JM, Ho CS, Hopewell PC, Keshavjee SA,  
329 Lienhardt C, Menzies R, Merrifield C, Narita M, O'Brien R, Peloquin CA, Raftery A,  
330 Saukkonen J, Schaaf HS, Sotgiu G, Starke JR, Migliori GB, Vernon A. 2016. Official  
331 American Thoracic Society/Centers for Disease Control and Prevention/Infectious  
332 Diseases Society of America Clinical Practice Guidelines: Treatment of Drug-Susceptible  
333 Tuberculosis. *Clin Infect Dis* 63:e147-e195.
- 334 26. Boman G, Ringberger VA. 1974. Binding of rifampicin by human plasma proteins. *Eur J*  
335 *Clin Pharmacol* 7:369-73.
- 336 27. Zheng X, Bao Z, Forsman LD, Hu Y, Ren W, Gao Y, Li X, Hoffner S, Bruchfeld J, Alffenaar  
337 JW. 2020. Drug exposure and minimum inhibitory concentration predict pulmonary  
338 tuberculosis treatment response. *Clin Infect Dis* 18.
- 339 28. Meyer UA, Zanger UM. 1997. Molecular mechanisms of genetic polymorphisms of drug  
340 metabolism. *Annu Rev Pharmacol Toxicol* 37:269-96.
- 341 29. Tostmann A, Mtabho CM, Semvua HH, van den Boogaard J, Kibiki GS, Boeree MJ,  
342 Aarnoutse RE. 2013. Pharmacokinetics of first-line tuberculosis drugs in Tanzanian  
343 patients. *Antimicrob Agents Chemother* 57:3208-13.



- 344 30. Aarnoutse R. 2011. Chapter 18: Pharmacogenetics of Antituberculosis Drugs, vol vol 40.  
345 Basel, Karger.
- 346 31. NTEP (National Tuberculosis Elimination Programme fRNTCP, RNTCP). 2016. Technical  
347 and Operational Guidelines for TB Control in India Directorate General of Health  
348 Services MoHaFW, Nirman Bhawan, Central TB Division, New Delhi - 110001.
- 349 32. RNCTP. April 2009. Training Manual for Mycobacterium tuberculosis Culture & Drug  
350 susceptibility testing. Directorate General of Health Services MoHaFW, Nirman Bhawan,  
351 Ministry of Health and Family Welfare, Nirman Bhawan, New Delhi 110011,
- 352 33. Mukherjee A, Velpandian T, Singla M, Kanhiya K, Kabra SK, Lodha R. 2016.  
353 Pharmacokinetics of isoniazid, rifampicin, pyrazinamide and ethambutol in HIV-infected  
354 Indian children. Int J Tuberc Lung Dis 20:666-72.

355

356

357

358

359

360

361

362

363

## Tables

364

365

366

367

368

369

370

371

372

373

374

375

376

377

378

379

380

381

382

383

384

385

386

**Table 1: Basic Demographic and Clinical Details of Study Population**

|     | <b>Characteristics</b>                          | <b>Statistics</b>                 | <b>Total (n*)</b> |
|-----|-------------------------------------------------|-----------------------------------|-------------------|
| 388 | <b>Age</b>                                      |                                   |                   |
| 389 | Age (years)                                     | 33.5 <sub>±</sub> 12.5 ( 15-65 )  | 131               |
| 390 | <b>Gender</b>                                   |                                   |                   |
| 391 | Male                                            | 87 (64.9%)                        | 134               |
| 392 | Female                                          | 47 (35.1%)                        |                   |
| 393 | <b>Retreatment Category</b>                     |                                   |                   |
| 394 | Relapse                                         | 77(57.5%)                         |                   |
| 395 | Treatment after Default                         | 18(13.4%)                         | 124               |
| 396 | Treatment Failure                               | 10(7.5%)                          |                   |
| 397 | Others                                          | 19(14.2%)                         |                   |
| 398 | <b>Smoking History</b>                          |                                   |                   |
| 399 | Non Smoker                                      | 73(54.5%)                         |                   |
| 400 | Ex Smoker                                       | 18(13.4%)                         | 117               |
| 401 | Smoker                                          | 26(19.4%)                         |                   |
| 402 | MSI ** - Ex Smokers                             | 219.47 <sub>±</sub> 265.63        |                   |
| 403 | MSI** - Smokers                                 | 391.78 <sub>±</sub> 810.34        |                   |
| 404 | <b>Other History</b>                            |                                   |                   |
| 405 | Alcohol intake                                  | 44(32.8%)                         | 116               |
| 406 | Family History of TB                            | 19(14.2%)                         |                   |
| 407 | <b>Clinical Data –Symptoms</b>                  |                                   |                   |
| 408 | Cough                                           | 98(73.1%)                         | 118               |
| 409 | Fever                                           | 65(48.5%)                         | 114               |
| 410 | Dyspnea                                         | 66(49.3%)                         | 117               |
| 411 | Expectoration                                   | 60(44.8%)                         | 112               |
| 412 | Hemoptysis                                      | 28(20.9%)                         | 114               |
| 413 | Night Sweats                                    | 16(11.9%)                         | 111               |
| 414 | Weight Loss                                     | 91(67.9%)                         | 118               |
| 415 | Loss of appetite                                | 90(67.2%)                         | 117               |
| 416 | Diarrhea                                        | 6(4.5%)                           | 112               |
| 417 | BMI*** (mean <sub>±</sub> SD) kg/m <sup>2</sup> | 17.9 <sub>±</sub> 3.6 (10.6-31.8) | 78                |
| 418 | <b>ATT schedule during study</b>                |                                   |                   |
| 419 | Daily                                           | 13(9.7%)                          | 134               |
| 420 | Intermittent                                    | 121(90.3%)                        |                   |

410 Data are presented as absolute numbers, percentage (%) or mean (±SD).

411 \*number of data available/recorded

412 \*\*MSI- Mean Smoking Index –Calculated as multiplicationof the average number of cigarettes  
413 smoked per day with duration (in years) .

414 \*\*\*BMI, Body Mass Index (weight in kilograms divided by the square of the height in meters)

415

416

417

**Table 2: PTB DOTS Category II Patients – Microbiological Diagnosis Details**

418

| 419 | Test            | Time Point<br>(month) | Tested<br>(n)    | Positive<br>(n)    | Negative<br>(n)   | MDR<br>(n) |
|-----|-----------------|-----------------------|------------------|--------------------|-------------------|------------|
| 420 |                 | 0                     | 132 <sup>§</sup> | 105 (79.55%)       | 27(20.45%)        | 0          |
| 421 | AFB Smear*      | 2                     | 83               | 9 (10.84%)         | 74(89.16%)        | 4          |
| 422 |                 | 3                     | 79               | 8 (10.13%)         | 71(89.87%)        | 17**       |
| 423 |                 | 5                     | 81               | 26 (32.10%)        | 55(67.90%)        |            |
|     |                 | 8                     | 47               | 2 (4.26%)          | 45(95.74%)        |            |
| 423 | MGIT Culture*** | 0                     | 133 <sup>§</sup> | <b>88 (66.17%)</b> | <b>45(33.83%)</b> |            |

424 \*AFB, acid-fast bacilli

425 \*\*Cumulative number of patients

426 \*\*\*MGIT Mycobacteria Growth Indicator Tube

427 <sup>§</sup> For One patient MGIT was not done and in two patients AFB smear data was missing

428

429

430

431

432

433

434

435 **Table 3: Plasma drug levels at 2 hrs post administration of ATT in DOTS category II PTB**  
 436 **patients**

| 437 | 438 Drug     | 439 Time Point (month) | Cured |                         | Not Cured |                         | p value            |
|-----|--------------|------------------------|-------|-------------------------|-----------|-------------------------|--------------------|
|     |              |                        | n*    | Plasma levels (µg/ml)** | n*        | Plasma levels (µg/ml)** |                    |
| 440 | ISONIAZID    | 0                      | 87    | 2.94(0.161-12.80)       | 17        | 0.86(0.06-8.27)         | 0.002 <sup>§</sup> |
| 441 |              | 2                      | 68    | 1.56(0.019-9.89)        | 14        | 0.58(0.14-3.07)         | 0.009 <sup>§</sup> |
| 442 |              | 3                      | 67    | 1.46(0.0331-12.30)      | 8         | 0.55(0.05-4.84)         | 0.172              |
| 443 |              | 5                      | 51    | 1.97(0.0934-13.90)      | 9         | 0.24(0.00-2.94)         | 0.031 <sup>§</sup> |
| 444 |              | 8                      | 36    | 1.00(0.0352-6.75)       | 3         | 0.25(0.02-1.01)         | 0.283              |
| 445 | RIFAMPICIN   | 0                      | 79    | 2.55(0.00268-20.20)     | 16        | 0.56(0.05-12.70)        | 0.003 <sup>§</sup> |
| 446 |              | 2                      | 54    | 1.26(0.0802-14.80)      | 9         | 1.31(0.19-9.01)         | 0.689              |
| 447 |              | 3                      | 55    | 1.44(0.0017-23.30)      | 5         | 0.29(0.01-1.49)         | 0.124              |
| 448 |              | 5                      | 46    | 1.39(0.00384-37.50)     | 8         | 0.24(0.04-2.87)         | 0.144              |
| 449 |              | 8                      | 31    | 1.32(0.0643-25.50)      | 3         | 0.25(0.06-1.68)         | 0.380              |
| 450 | PYRAZINAMIDE | 0                      | 88    | 26.58(1.03-81.60)       | 15        | 1.85(0.06-30.50)        | 0.000 <sup>§</sup> |
| 451 |              | 2                      | 71    | 17.72(0.105-181.0)      | 14        | 1.01(0.04-6.43)         | 0.002 <sup>§</sup> |
| 452 | ETHAMBUTOL   | 0                      | 88    | 1.53(0.0803-11.80)      | 17        | 0.72(0.18-2.15)         | 0.010 <sup>§</sup> |
| 453 |              | 2                      | 70    | 1.47(0.115-18.00)       | 14        | 0.66(0.16-2.19)         | 0.043 <sup>§</sup> |
| 454 |              | 3                      | 68    | 1.56(0.0365-19.80)      | 8         | 1.11(0.22-5.07)         | 0.332              |
| 455 |              | 5                      | 53    | 1.18(0.0676-22.90)      | 9         | 0.25(0.03-2.38)         | 0.137              |
| 456 |              | 8                      | 36    | 1.56(0.00813-22.50)     | 3         | 0.64(0.08-3.26)         | 0.344              |
| 457 | STREPTOMYCIN | 0                      | 83    | 18.08(0.059-73.60)      | 19        | 31.84(1.87-100.00)      | 0.007 <sup>§</sup> |

454 Time point 0 represents day of initiation of therapy.

455 \*number of data available/recorded

456 \*\* C2hr data from subjects (on intermittent regimen) was log transformed and is presented as  
 457 the geometric mean along with range (minimum-maximum) in µg/ml

458 §Values indicate significant differences between cured and not cured groups (P ≤0.05) by one  
 459 way ANOVA

460

**Table 4. Receiver operator characteristics (ROC) values for plasma levels of ATT in PTB patients on Retreatment regimen**

| ATT Drug     | n   | Area under the Curve | [ 95% CI ]  | Optimal Cut off *<br>(µg/ml) | Sensitivity | Specificity |
|--------------|-----|----------------------|-------------|------------------------------|-------------|-------------|
| ISONIAZID    | 104 | 0.788                | [0.67-0.90] | 1.86                         | 0.71        | 0.82        |
| RIFAMPICIN   | 95  | 0.770                | [0.65-0.89] | 1.14                         | 0.77        | 0.75        |
| PYRAZINAMIDE | 103 | 0.924                | [0.84-1.00] | 10.6                         | 0.86        | 0.87        |
| ETHAMBUTOL   | 105 | 0.712                | [0.60-0.83] | 1.24                         | 0.60        | 0.76        |
| STREPTOMYCIN | 102 | 0.684                | [0.54-0.83] | 38.0                         | 0.63        | 0.64        |

468

469 Table shows accuracy of area under the curve for C2hr plasma levels of ATT in PTB patients on  
470 retreatment regimen

471 \*Optimal cut off values (column 4) or Therapeutic indicator levels (minimum plasma drug  
472 concentrations that predict a positive treatment outcome ('Cured') in the study population).

473

474

475

476

477

478

479

480

481

482

483

484

485 **Figure legends**

486 **Figure 1: Serum levels (ug/ml) at different time points for Category II retreatment regimen**  
487 **drugs in PTB patients**

488 Figure 1: a). ATT Plasma levels in Cured and Not Cured PTB patient groups. **b)** ATT Plasma levels  
489 in Cured, Rifampicin resistant (RR)MDR and Rifampicin sensitive (RS)Not Cured- groups. X axis  
490 shows time points of drug administration i.e. day 0, 2 month, 3 month, 5 month and 8 month  
491 (0, 2, 3, 5 and 8 - fig1a) or day 0,2<sup>nd</sup> month and 3<sup>rd</sup> month (0, 2 and 3 -fig1b). Y-axis shows  
492 geometric mean of plasma drug concentrations ( $\mu\text{g/ml}$ ) of INH, RIF, PZA, EMB and STM as  
493 measured by HPLC-MS in patient blood samples after 2hrs of drug ingestion on day 0.  
494 Pyrazinamide is shown for 2 months and streptomycin  $C_{2\text{hr}}$  levels are shown for day 0 time  
495 point as per the treatment regimen.

496 Solid line shows data from Cured subjects and dotted line shows data from Not-cured patients.  
497 + represents therapeutic indicator levels i.e. Oday- $C_{2\text{hr}}$  levels required for a successful treatment  
498 outcome from cut off predicted from ROC analysis . Statistical significance is as shown in Table  
499 3.

500 **Figure 2. Pharmacokinetic variability of isoniazid, rifampicin, pyrazinamide and ethambutol**  
501 **in PTB patients on retreatment regimen at Day0- $C_{2\text{hr}}$  .**

502 Figure 2. Figure shows the percentage of patients with very low, low and target (high) serum  
503 concentrations at  $C_{2\text{hr}}$  on Day0 of drug dose administration in 'cured' and 'not cured' groups for  
504 isoniazid, rifampicin, pyrazinamide and ethambutol .

505 Values are in comparison to adult reference ranges as reported previously (17) (18)

506 Target ranges: H- 3–6 µg/ml , R- 8–24 µg/ml , Z- 20-50 µg/ml and E- 2–6 µg/ml (17)

507 Low plasma concentrations: H < 3µg/ml , R < 8µg/ml , Z < 35 µg/ml and E < 2 µg/ml .

508 Very low plasma concentrations: H < 1.5µg/ml , R < 4µg/ml , Z < 20 µg/ml and E < 1 µg/ml

509 (18)

### 510 **Figure 3: ROC Analysis of ATT drugs in PTB patients onretreatment regimen**

511 Figure 3: Figure shows ROC curve analysis of Day0-C<sub>2hr</sub> plasma levels of ATT-drugs, isoniazid

512 (INH), rifampicin (RIF), pyrazimanide (PZA), ethambutol (EMB) and streptomycin (STM) in PTB

513 patients on retreatment regimen. Values are as given in table 4.

### 514 **Figure 4: Daily vs intermittent regimen in PTB patients.**

515 Figure 4: Plasma levels of ATT drugs INH, RIF, PZA, EMB and STM at different time points of

516 Daily vs Intermittent/Alternate Day regimen in PTB patients. X axis shows time points of drug

517 administration i.e. day 0, 2 month, 3 month, 5 month and 8 month (0, 2, 3, 5 and 8).Y-axis

518 shows Geometric Mean of plasma drug concentration (µg/ml ) as measured by LC-MS in patient

519 blood samples after 2hrs of drug ingestion. Solid line (—●—) represents plasma levels of daily

520 regimen subjects while intermittent regimen patient data is shown by a dashed line (—▲—).\*

521 denotes statistical significance  $p \leq 0.05$  Pyrazinamide is shown for upto 2 months and

522 streptomycin C<sub>2hr</sub> levels are shown for Day0

### 523 **Figure S1: Study Approach:**

524 Figure illustrates a schematic design of the study from patient enrolment until statistical

525 analysis



526

## Figures

527

528

529

530

531

532

533

534

535

536

537

538

539

540

541

542

543  
544  
545  
546  
547  
548  
549  
550  
551  
552  
553  
554  
555  
556  
557  
558  
559  
560  
561  
562  
563  
564  
565  
566

Fig 1

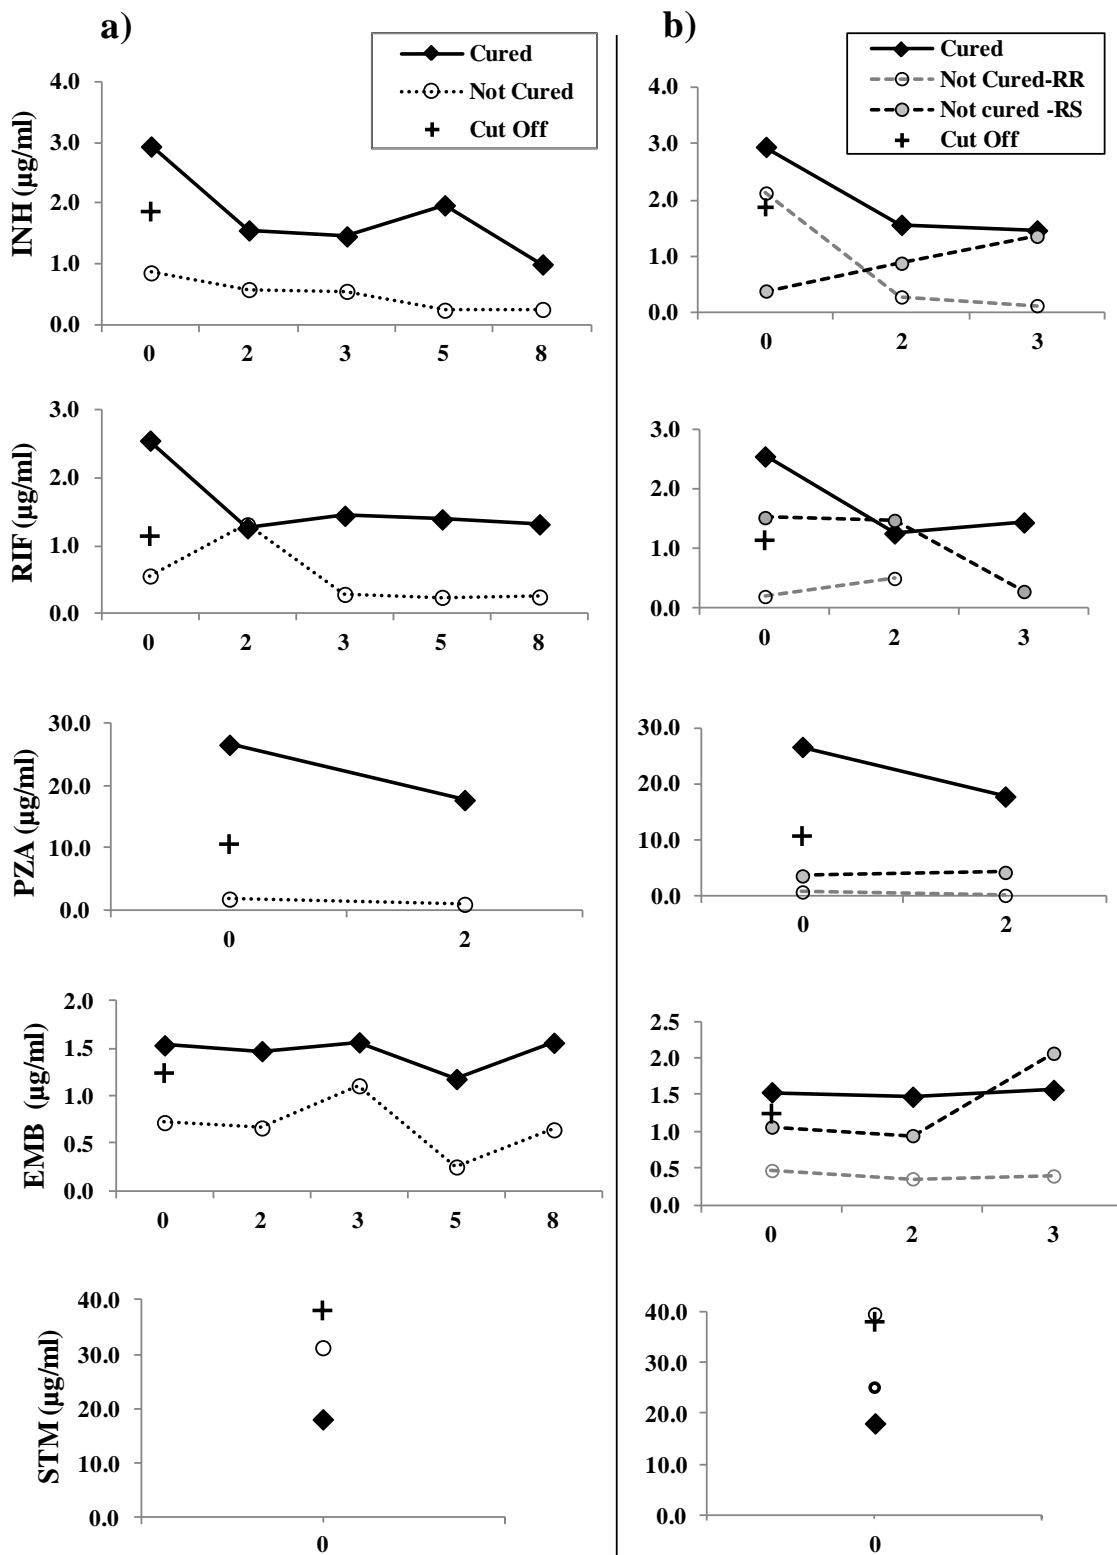

567  
568  
569  
570  
571  
572  
573  
574  
575  
576  
577  
578  
579  
580  
581  
582  
583  
584  
585  
586  
587  
588  
589  
590  
591  
592  
593  
594

Fig 2

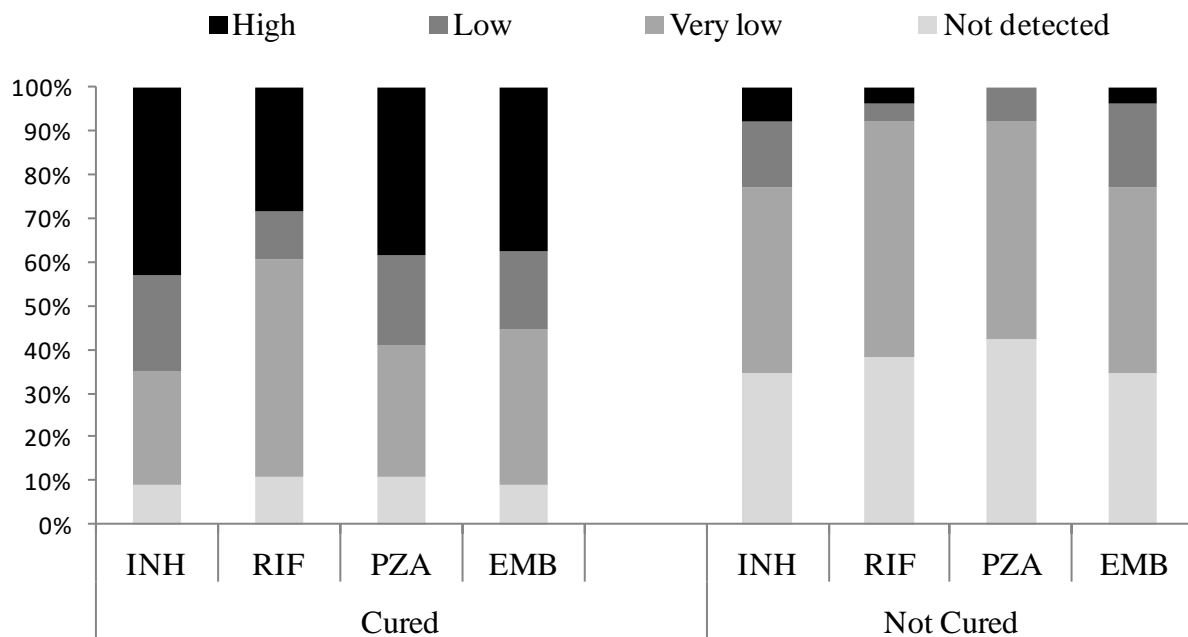

595  
596  
597  
598  
599  
600  
601  
602  
603  
604  
605  
606  
607  
608  
609  
610  
611  
612  
613  
614  
615  
616  
617  
618  
619  
620  
621  
622  
623  
624  
625  
626  
627  
628  
629  
630  
631

Fig 3

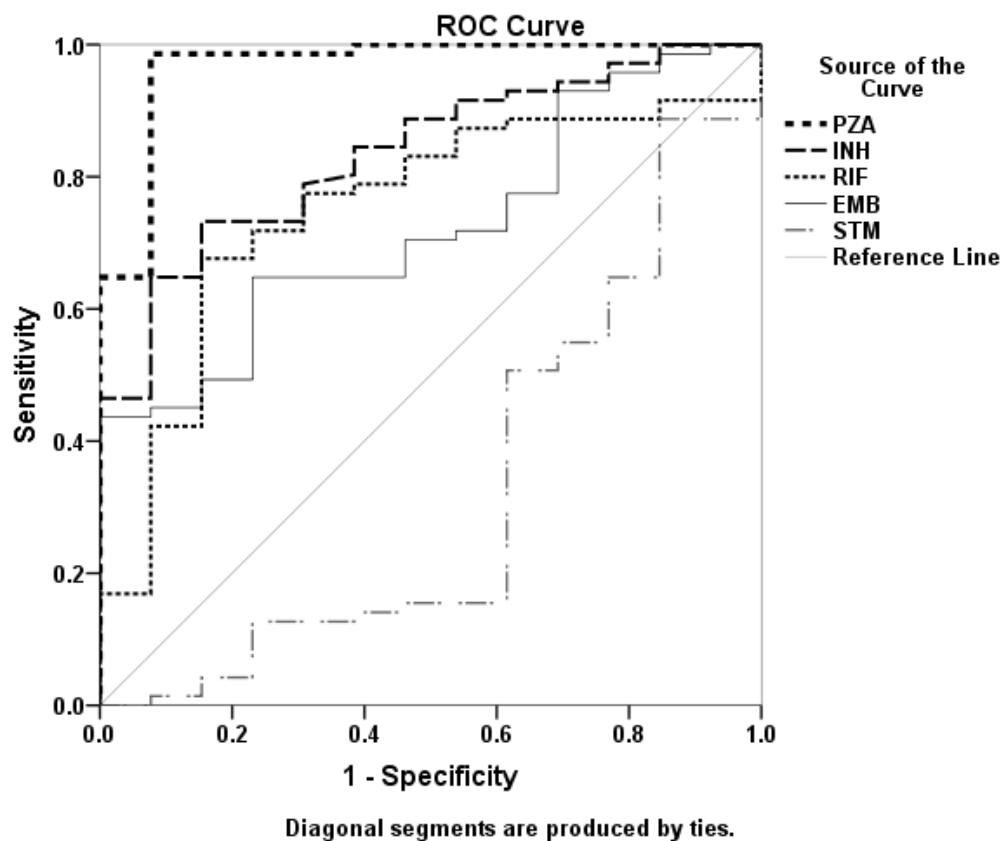

632  
633  
634  
635  
636  
637  
638  
639  
640  
641  
642  
643  
644  
645  
646  
647  
648  
649  
650  
651  
652  
653  
654  
655  
656

Fig 4

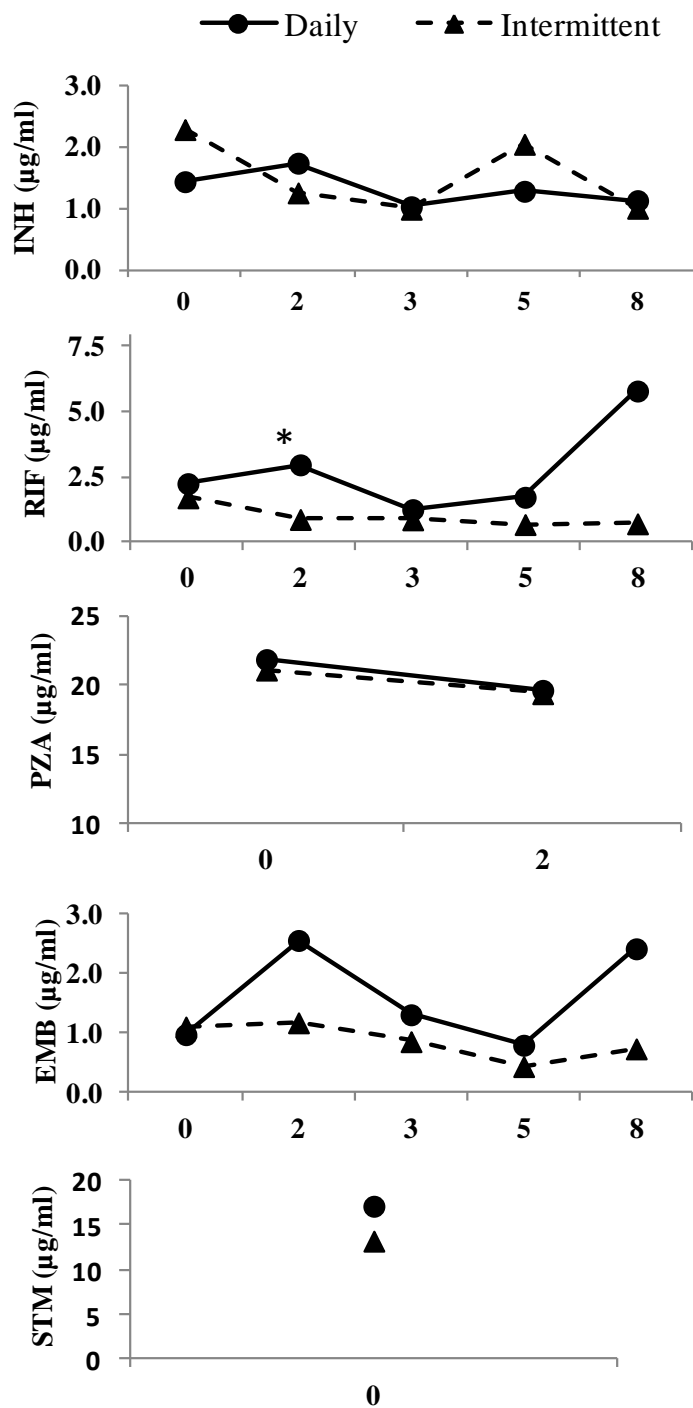

657  
658  
659  
660  
661  
662  
663  
664  
665  
666  
667  
668  
669  
670  
671  
672  
673  
674

Fig S1

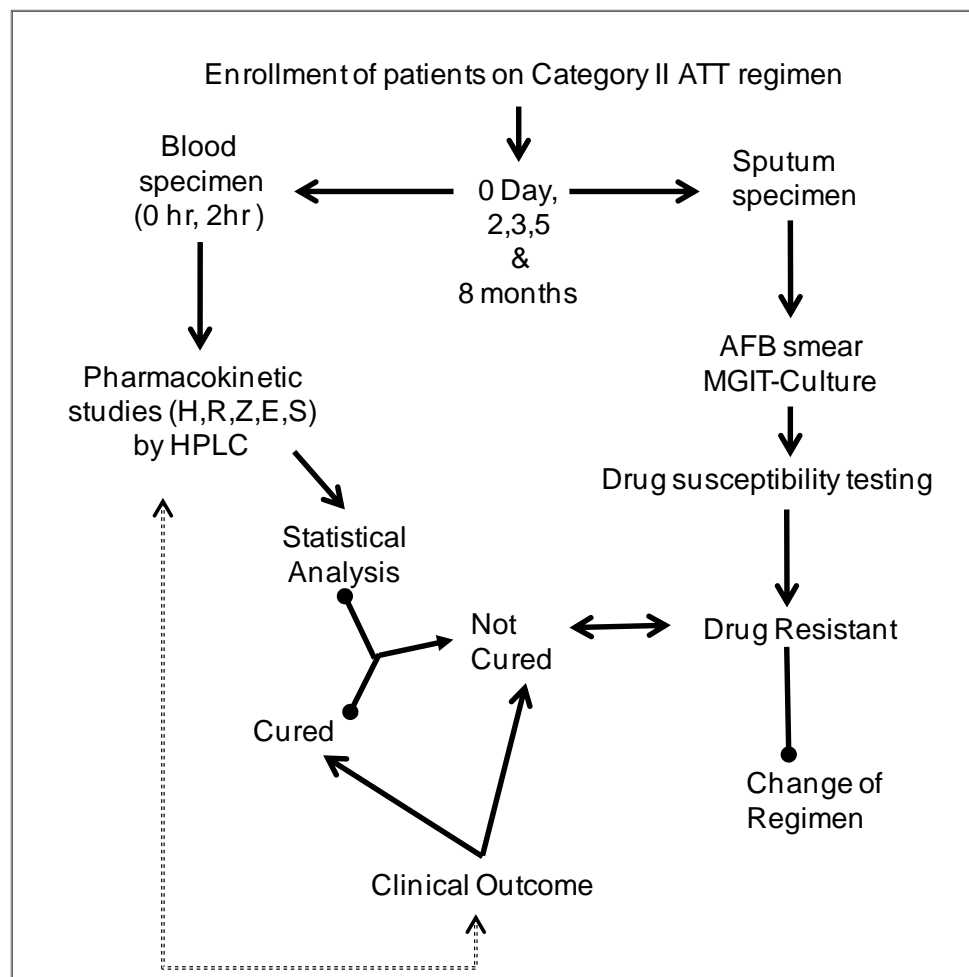

Source: https://medrxiv.org/content/10.1101/2021.08.11.21261879v1.full.pdf
